# Supplementary material for: Insights into Hypoxic Systemic Responses Based on Analyses of Transcriptional Regulation in Arabidopsis
Source: PubMed Central journal article supplement (PMC3240646; doi:10.1371/journal.pone.0028888), 2011-12-15
Supplement: pone.0028888.s001.pdf [file pone.0028888.s001.pdf]

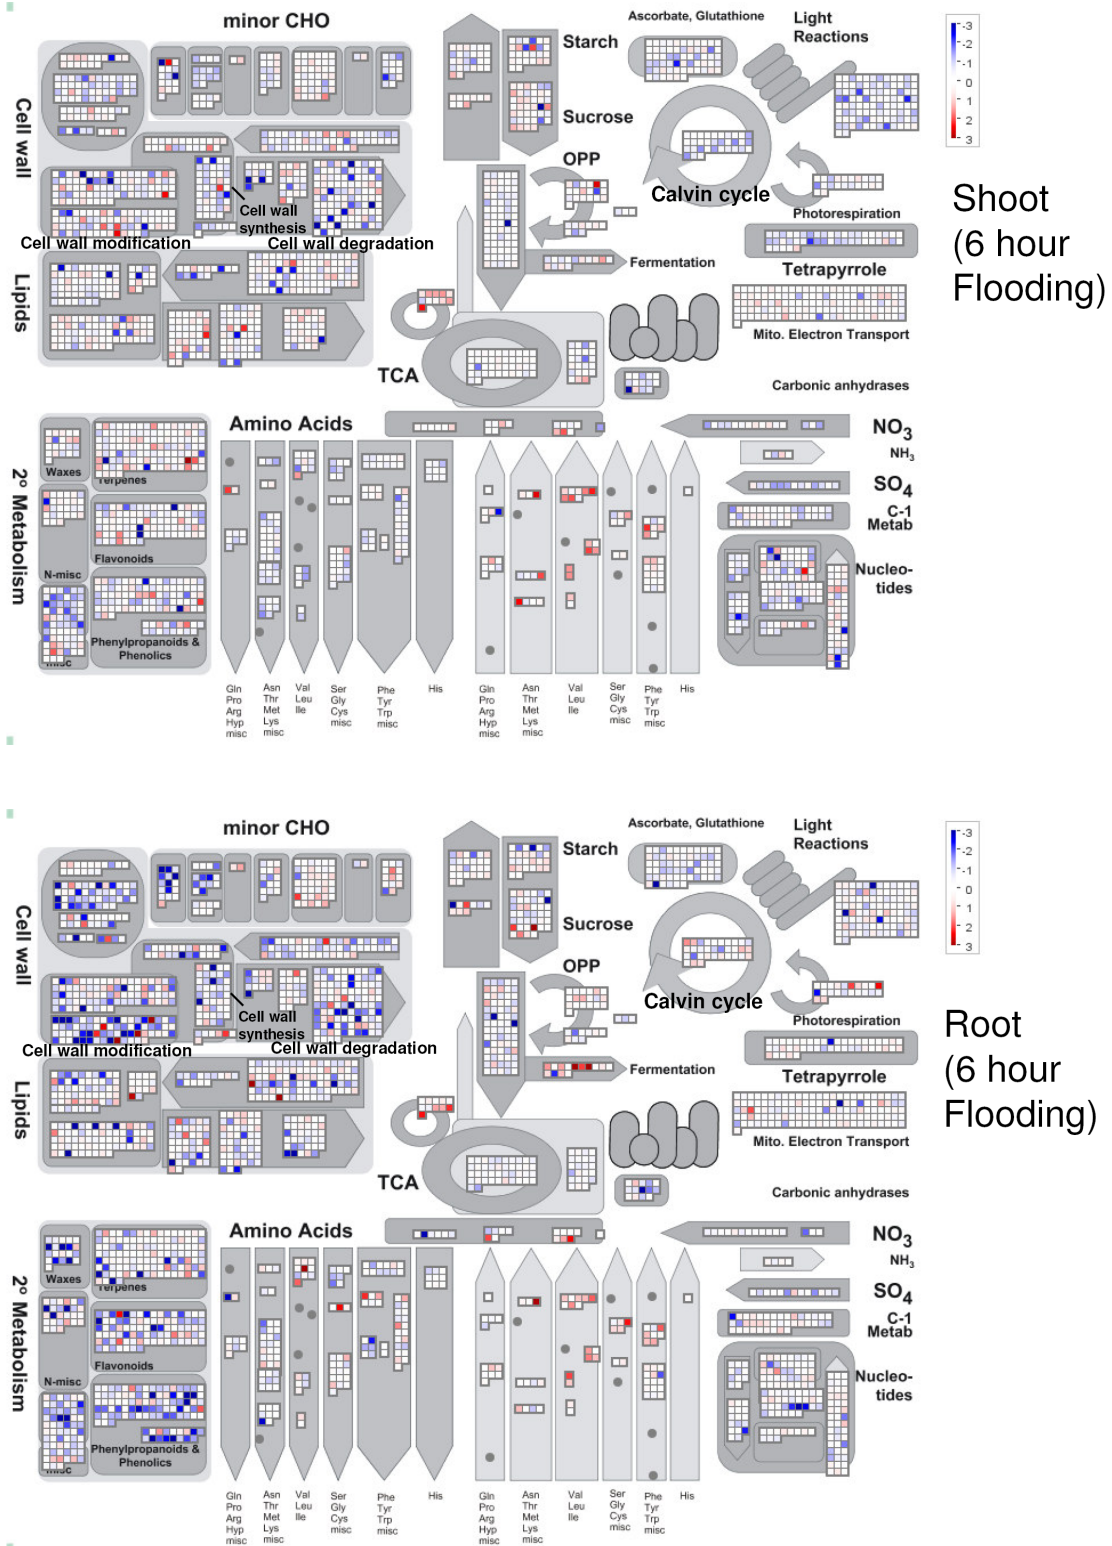

**Figure S1.** Mapman overview of transcriptional changes in shoots and roots of root-flooded plants. The Mapman overview of metabolism showed corresponding genes acted differentially between shoots and roots.  $\text{Log}_2$  expression values at the 6 hour time point for individual genes were plotted on boxes corresponding to their functional annotation as indicated color in the scale bars.
