# Supplementary material for: Insights into Hypoxic Systemic Responses Based on Analyses of Transcriptional Regulation in Arabidopsis
Source: PubMed Central journal article supplement (PMC3240646; doi:10.1371/journal.pone.0028888), 2011-12-15
Supplement: pone.0028888.s002.pdf [file pone.0028888.s002.pdf]

Systemic responsive genes  
in *Arabidopsis*: 2502 genes

Systemic responsive  
homologues in cotton: 765 genes

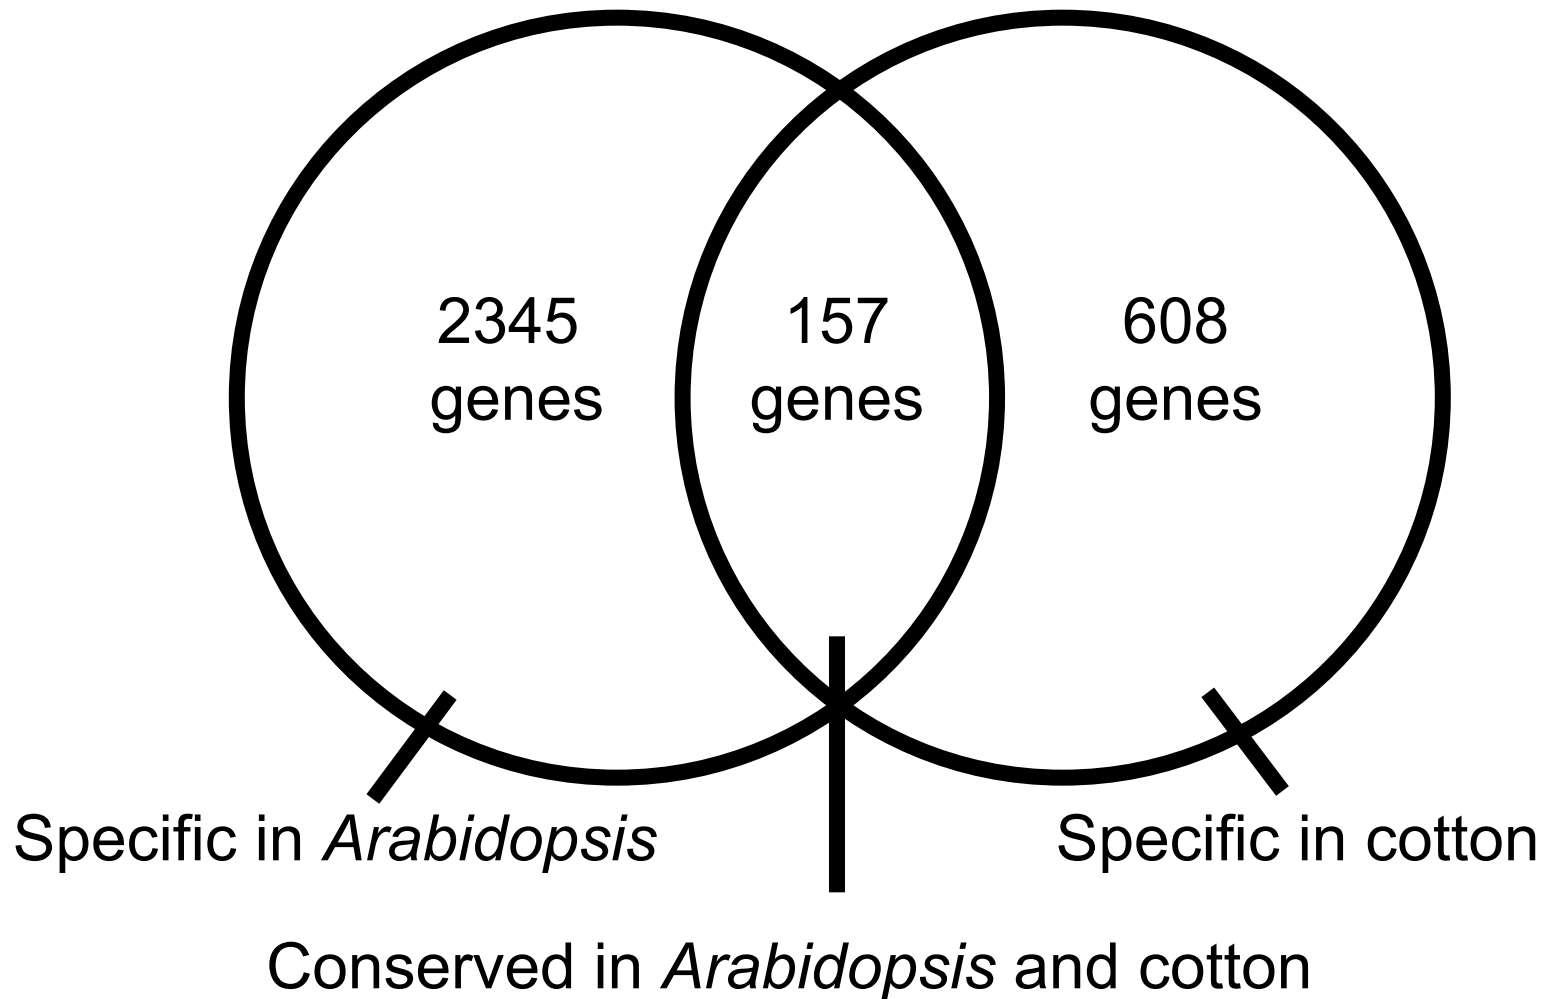

**Figure S2.** Venn diagram overlap of systemic hypoxia responsive homologues between *Arabidopsis* and cotton. Systemic responsive genes were from lists in Class I and II (Figure 1) for *Arabidopsis* and from closest homologues of leaves responsive genes in cotton (Christianson et al., 2010). These lists were filtered out at fold change  $> 2$  and  $< 0.5$  in expression with p values  $< 0.05$  at any one time point from 1 to 12 h in shoots.
