# Supplementary material for: Insights into Hypoxic Systemic Responses Based on Analyses of Transcriptional Regulation in Arabidopsis
Source: PubMed Central journal article supplement (PMC3240646; doi:10.1371/journal.pone.0028888), 2011-12-15
Supplement: pone.0028888.s006.pdf [file pone.0028888.s006.pdf]

Table S4. Sugar transporters tend to upregulated in shoots but downregulated in roots under flooding

| Mapman Functional categories                                      | ID        | Flooding/ control       |      |      |      |      |      |       |      |      |      | Description                                               |    |
|-------------------------------------------------------------------|-----------|-------------------------|------|------|------|------|------|-------|------|------|------|-----------------------------------------------------------|----|
|                                                                   |           | time under flooding (h) | Root |      |      |      |      | Shoot |      |      |      |                                                           |    |
|                                                                   |           |                         | 0.5  | 1    | 3    | 6    | 12   | 0.5   | 1    | 3    | 6    |                                                           | 12 |
| <b>Upregulated :</b>                                              |           |                         |      |      |      |      |      |       |      |      |      |                                                           |    |
| <b>Shoot only ( 9 of 716 )</b>                                    |           |                         |      |      |      |      |      |       |      |      |      |                                                           |    |
| [34.2] transporter.sugars                                         | At1g20840 | 1.1                     | 1.4  | 1.4  | 1.0  | 1.4  | 1.2  | 1.4   | 2.0  | 2.8  | 3.1  | TMT1 (TONOPLAST MONOSACCHARIDE TRANSPORTER1)              |    |
| [34.2] transporter.sugars                                         | At1g30220 | 0.6                     | 0.6  | 0.5  | 0.5  | 1.0  | 1.0  | 1.3   | 1.6  | 2.7  | 6.0  | ATINT2 (INOSITOL TRANSPORTER 2)                           |    |
| [34.2] transporter.sugars                                         | At2g22730 | 1.0                     | 1.1  | 1.5  | 1.7  | 1.7  | 0.9  | 1.1   | 1.0  | 1.4  | 2.1  | transporter-related                                       |    |
| [34.2] transporter.sugars                                         | At3g05400 | 0.9                     | 0.9  | 1.0  | 1.0  | 1.0  | 1.0  | 1.0   | 1.1  | 1.5  | 2.6  | sugar transporter, putative                               |    |
| [34.2] transporter.sugars                                         | At4g02050 | 0.9                     | 1.3  | 1.3  | 1.2  | 1.1  | 1.0  | 1.1   | 1.6  | 1.7  | 2.2  | sugar transporter, putative                               |    |
| [34.2] transporter.sugars                                         | At4g35300 | 0.8                     | 0.6  | 0.7  | 0.8  | 0.9  | 1.0  | 0.9   | 1.1  | 1.7  | 2.2  | TMT2 (TONOPLAST MONOSACCHARIDE TRANSPORTER2)              |    |
| [34.2] transporter.sugars                                         | At5g26340 | 1.0                     | 1.1  | 1.0  | 0.5  | 0.5  | 1.4  | 1.7   | 2.7  | 4.0  | 5.1  | MSS1 (SUGAR TRANSPORT PROTEIN 13)                         |    |
| [34.2] transporter.sugars                                         | At5g27350 | 0.9                     | 1.4  | 1.3  | 1.3  | 1.4  | 1.1  | 1.1   | 1.6  | 2.2  | 3.1  | SFP1; carbohydrate transporter/ sugar porter              |    |
| [34.8] transport.metabolite transporters at the envelope membrane | At1g61800 | 1.3                     | 1.9  | 2.3  | 2.1  | 1.4  | 0.9  | 0.8   | 1.3  | 2.7  | 5.0  | GPT2 (glucose-6-phosphate/phosphate translocator 2)       |    |
| <b>Shoot &amp; root both ( 1 of 204 )</b>                         |           |                         |      |      |      |      |      |       |      |      |      |                                                           |    |
| [34.9] transport.misc                                             | At1g79360 | 2.3                     | 3.8  | 2.9  | 1.4  | 1.7  | 0.8  | 1.7   | 3.1  | 7.0  | 4.6  | transporter-related                                       |    |
| <b>Root only ( 4 of 1452 )</b>                                    |           |                         |      |      |      |      |      |       |      |      |      |                                                           |    |
| [34.2] transporter.sugars                                         | At1g54730 | 1.0                     | 1.2  | 2.5  | 2.6  | 2.7  | 0.9  | 1.2   | 1.4  | 1.4  | 1.5  | sugar transporter, putative                               |    |
| [34.2] transporter.sugars                                         | At2g20780 | 1.1                     | 1.0  | 1.4  | 1.8  | 2.6  | 1.1  | 0.8   | 0.8  | 1.0  | 1.1  | mannitol transporter, putative                            |    |
| [34.2] transporter.sugars                                         | At3g19930 | 1.3                     | 2.8  | 3.3  | 2.3  | 2.0  | 1.0  | 1.1   | 1.1  | 1.1  | 1.3  | STP4 (SUGAR TRANSPORTER 4)                                |    |
| [34.11] transport.NDP.sugars at the ER                            | At2g02810 | 1.1                     | 1.6  | 2.6  | 2.1  | 1.4  | 1.1  | 1.1   | 1.5  | 1.2  | 1.9  | ATUTR1/UTR1 (UDP-GALACTOSE TRANSPORTER 1)                 |    |
| <b>Down-regulated:</b>                                            |           |                         |      |      |      |      |      |       |      |      |      |                                                           |    |
| <b>Shoot only ( 1 of 938 )</b>                                    |           |                         |      |      |      |      |      |       |      |      |      |                                                           |    |
| [34.2] transporter.sugars                                         | At5g59250 | 1.00                    | 1.03 | 0.94 | 0.64 | 0.51 | 1.08 | 1.00  | 0.97 | 0.72 | 0.37 | sugar transporter family protein                          |    |
| <b>Shoot &amp; root both ( 4 of 464 )</b>                         |           |                         |      |      |      |      |      |       |      |      |      |                                                           |    |
| [34.2] transporter.sugars                                         | At1g19450 | 1.14                    | 0.70 | 0.28 | 0.21 | 0.16 | 1.10 | 0.99  | 0.54 | 0.32 | 0.28 | integral membrane protein, putative                       |    |
| [34.7] transport.phosphate                                        | At2g29650 | 0.76                    | 0.86 | 0.50 | 0.36 | 0.35 | 0.91 | 0.97  | 0.81 | 0.57 | 0.23 | inorganic phosphate transporter, putative                 |    |
| [34.8] transport.metabolite transporters at the envelope membrane | At5g17630 | 0.95                    | 0.79 | 0.48 | 0.45 | 0.44 | 0.92 | 0.85  | 0.66 | 0.54 | 0.46 | glucose-6-phosphate/phosphate translocator, putative      |    |
| [34.9] transport.misc                                             | At1g16370 | 1.42                    | 1.20 | 0.33 | 0.18 | 0.15 | 1.43 | 0.84  | 0.33 | 0.20 | 0.19 | transporter-related                                       |    |
| <b>Root only ( 12 of 1716 )</b>                                   |           |                         |      |      |      |      |      |       |      |      |      |                                                           |    |
| [34.2] transporter.sugars                                         | At1g08890 | 0.96                    | 0.94 | 0.41 | 0.24 | 0.17 | 1.00 | 1.18  | 1.26 | 1.18 | 1.19 | sugar transporter family protein                          |    |
| [34.2] transporter.sugars                                         | At1g08920 | 1.13                    | 0.62 | 0.42 | 0.40 | 0.49 | 1.06 | 1.05  | 1.12 | 1.50 | 1.85 | carbohydrate transporter/ sugar porter                    |    |
| [34.2] transporter.sugars                                         | At1g73220 | 0.94                    | 0.75 | 0.34 | 0.13 | 0.25 | 1.18 | 1.33  | 2.22 | 2.18 | 2.53 | sugar transporter family protein                          |    |
| [34.2] transporter.sugars                                         | At1g79410 | 0.69                    | 0.36 | 0.37 | 0.53 | 0.63 | 1.13 | 1.16  | 1.21 | 1.72 | 1.50 | transporter-related                                       |    |
| [34.2] transporter.sugars                                         | At2g18480 | 0.75                    | 0.51 | 0.55 | 0.64 | 0.28 | 1.14 | 0.80  | 0.72 | 0.91 | 0.51 | mannitol transporter, putative                            |    |
| [34.2] transporter.sugars                                         | At3g03090 | 1.22                    | 0.93 | 0.71 | 0.53 | 0.45 | 0.94 | 0.85  | 0.92 | 1.13 | 1.05 | sugar transporter family protein                          |    |
| [34.2] transporter.sugars                                         | At3g20460 | 0.55                    | 0.48 | 0.34 | 0.28 | 0.23 | 1.37 | 0.92  | 1.10 | 0.43 | 0.71 | sugar transporter, putative                               |    |
| [34.2] transporter.sugars                                         | At5g18840 | 0.88                    | 1.27 | 1.49 | 0.74 | 0.43 | 1.02 | 1.57  | 1.67 | 0.97 | 0.88 | sugar transporter, putative                               |    |
| [34.2.1] transporter.sugars.sucrose                               | At1g66570 | 1.05                    | 1.03 | 0.50 | 0.39 | 0.37 | 1.18 | 0.93  | 0.74 | 0.63 | 0.59 | ATSUC7 (SUCROSE-PROTON SYMPORTER 7)                       |    |
| [34.7] transport.phosphate                                        | At2g38060 | 1.30                    | 1.21 | 0.36 | 0.18 | 0.22 | 1.45 | 1.34  | 1.11 | 0.59 | 1.21 | transporter-related                                       |    |
| [34.8] transport.metabolite transporters at the envelope membrane | At1g43310 | 1.14                    | 1.00 | 0.63 | 0.49 | 0.52 | 1.12 | 0.88  | 0.82 | 0.89 | 0.83 | triose phosphate/phosphate translocator-related           |    |
| [34.8] transport.metabolite transporters at the envelope membrane | At5g33320 | 0.97                    | 0.92 | 0.56 | 0.44 | 0.50 | 0.89 | 0.77  | 0.74 | 0.74 | 0.72 | CUE1 (CAB UNDEREXPRESSED 1); triose-phosphate transporter |    |
| [34.9] transporter.membrane system                                | At3g47420 | 0.28                    | 0.26 | 0.38 | 0.55 | 0.54 | 0.75 | 0.89  | 0.83 | 0.61 | 0.60 | glycerol-3-phosphate transporter, putative                |    |

Color indicates expression by following scale:  0.25 0.5 1 2 4
