# Supplementary material for: Insights into Hypoxic Systemic Responses Based on Analyses of Transcriptional Regulation in Arabidopsis
Source: PubMed Central journal article supplement (PMC3240646; doi:10.1371/journal.pone.0028888), 2011-12-15
Supplement: pone.0028888.s011.pdf [file pone.0028888.s011.pdf]

Table S9. Mediation of *ein2-5* in hormone-signaling and -metabolism and in suppression of cell wall biosynthesis under flooding.

| Mapman bins/ Classification                                                           | ID        | (h) | Flooding/ control |      |      |       |      |       |               |      |      |       |      |      | Description                                                                 |
|---------------------------------------------------------------------------------------|-----------|-----|-------------------|------|------|-------|------|-------|---------------|------|------|-------|------|------|-----------------------------------------------------------------------------|
|                                                                                       |           |     | Columbia          |      |      |       |      |       | <i>ein2-5</i> |      |      |       |      |      |                                                                             |
|                                                                                       |           |     | Root              |      |      | Shoot |      |       | Root          |      |      | Shoot |      |      |                                                                             |
| 0.5                                                                                   | 3         | 6   | 0.5               | 3    | 6    | 0.5   | 3    | 6     | 0.5           | 3    | 6    |       |      |      |                                                                             |
| <b>Hormone metabolism</b>                                                             |           |     |                   |      |      |       |      |       |               |      |      |       |      |      |                                                                             |
| <b>Class I (20 of 195)</b>                                                            |           |     |                   |      |      |       |      |       |               |      |      |       |      |      |                                                                             |
| [17.2.3] hormone metabolism.auxin.induced-regulated-responsive-activated              | At1g29430 |     | 0.67              | 1.22 | 1.33 | 0.97  | 0.52 | 0.29  | 0.28          | 0.25 | 0.82 | 1.06  | 1.66 | 1.85 | auxin-responsive family protein                                             |
| [17.2.3] hormone metabolism.auxin.induced-regulated-responsive-activated              | At1g29440 |     | 1.19              | 2.66 | 1.37 | 0.90  | 0.51 | 0.32  | 0.73          | 1.69 | 1.78 | 1.21  | 1.72 | 1.71 | auxin-responsive family protein                                             |
| [17.2.3] hormone metabolism.auxin.induced-regulated-responsive-activated              | At1g29450 |     | 0.98              | 1.04 | 1.16 | 1.00  | 0.74 | 0.52  | 0.22          | 1.32 | 1.84 | 1.19  | 2.27 | 2.57 | auxin-responsive protein, putative                                          |
| [17.2.3] hormone metabolism.auxin.induced-regulated-responsive-activated              | At1g29490 |     | 0.74              | 1.28 | 1.24 | 0.86  | 0.63 | 0.45  | 0.11          | 0.54 | 0.92 | 1.18  | 2.23 | 2.72 | auxin-responsive family protein                                             |
| [17.2.3] hormone metabolism.auxin.induced-regulated-responsive-activated              | At1g29500 |     | 0.96              | 1.25 | 1.44 | 0.96  | 0.59 | 0.39  | 0.43          | 0.59 | 0.84 | 1.32  | 2.73 | 2.56 | auxin-responsive protein, putative                                          |
| [17.2.3] hormone metabolism.auxin.induced-regulated-responsive-activated              | At1g29510 |     | 0.60              | 1.20 | 1.31 | 0.85  | 0.53 | 0.36  | 0.33          | 0.44 | 0.41 | 1.25  | 1.84 | 1.72 | auxin-responsive protein, putative                                          |
| [17.2.3] hormone metabolism.auxin.induced-regulated-responsive-activated              | At1g75580 |     | 0.74              | 2.13 | 1.80 | 0.72  | 0.84 | 0.81  | 0.52          | 1.13 | 1.44 | 1.25  | 0.97 | 1.22 | auxin-responsive protein, putative                                          |
| [17.2.3] hormone metabolism.auxin.induced-regulated-responsive-activated              | At4g36110 |     | 1.41              | 2.15 | 2.38 | 0.82  | 0.50 | 0.55  | 0.74          | 1.68 | 2.35 | 1.61  | 1.70 | 1.67 | auxin-responsive protein, putative                                          |
| [17.2.3] hormone metabolism.auxin.induced-regulated-responsive-activated              | At4g38840 |     | 0.94              | 1.41 | 0.67 | 0.84  | 0.57 | 0.51  | 0.11          | 1.25 | 2.15 | 0.87  | 1.56 | 1.58 | auxin-responsive protein, putative                                          |
| [17.2.3] hormone metabolism.auxin.induced-regulated-responsive-activated              | At4g38850 |     | 1.23              | 0.25 | 0.05 | 1.05  | 0.68 | 0.53  | 0.47          | 1.18 | 0.55 | 1.00  | 2.38 | 1.56 | SAUR_AC1 (SMALL AUXIN UP RNA 1)                                             |
| [17.2.3] hormone metabolism.auxin.induced-regulated-responsive-activated              | At5g18010 |     | 0.98              | 0.85 | 0.81 | 1.09  | 0.73 | 0.68  | 1.08          | 0.83 | 0.77 | 1.18  | 2.52 | 2.71 | auxin-responsive protein, putative                                          |
| [17.2.3] hormone metabolism.auxin.induced-regulated-responsive-activated              | At5g18020 |     | 1.20              | 1.02 | 1.40 | 1.06  | 0.76 | 0.59  | 1.09          | 0.87 | 0.98 | 1.30  | 3.24 | 3.55 | auxin-responsive protein, putative                                          |
| [17.2.3] hormone metabolism.auxin.induced-regulated-responsive-activated              | At5g18030 |     | 1.52              | 1.25 | 1.04 | 1.11  | 0.76 | 0.64  | 1.49          | 1.38 | 0.93 | 1.45  | 3.19 | 3.06 | auxin-responsive protein, putative                                          |
| [17.2.3] hormone metabolism.auxin.induced-regulated-responsive-activated              | At5g18060 |     | 0.97              | 1.09 | 0.99 | 1.02  | 0.79 | 0.72  | 0.24          | 0.77 | 0.82 | 1.27  | 3.64 | 3.82 | auxin-responsive protein, putative                                          |
| [17.2.3] hormone metabolism.auxin.induced-regulated-responsive-activated              | At5g18080 |     | 0.80              | 0.74 | 0.75 | 0.99  | 0.71 | 0.57  | 0.76          | 0.31 | 0.85 | 1.24  | 2.91 | 3.62 | auxin-responsive protein, putative                                          |
| [17.2.3] hormone metabolism.auxin.induced-regulated-responsive-activated              | At5g27780 |     | 0.89              | 1.56 | 1.28 | 0.86  | 0.51 | 0.30  | 0.81          | 0.78 | 1.33 | 1.21  | 1.79 | 1.60 | auxin-responsive family protein                                             |
| [17.2.2] hormone metabolism.auxin signal transduction                                 | At1g70940 |     | 0.84              | 0.85 | 0.85 | 0.53  | 0.79 | 0.48  | 1.08          | 0.76 | 0.72 | 1.10  | 2.63 | 2.89 | PIN3 (PIN-FORMED 3); auxin:hydrogen symporter/ transporter                  |
| [17.5.2] hormone metabolism.ethylene.signal transduction                              | At1g06160 |     | 0.73              | 2.46 | 2.68 | 0.49  | 0.42 | 0.33  | 0.74          | 2.10 | 2.97 | 0.96  | 1.82 | 1.69 | ethylene-responsive factor, putative                                        |
| [17.5.2] hormone metabolism.ethylene.signal transduction                              | At2g40940 |     | 0.80              | 1.12 | 0.79 | 0.72  | 0.68 | 0.43  | 0.95          | 1.78 | 1.60 | 1.09  | 1.47 | 2.00 | ERS1 (ETHYLENE RESPONSE SENSOR 1); receptor                                 |
| [17.5.2] hormone metabolism.ethylene.signal transduction                              | At5g61590 |     | 1.62              | 4.55 | 4.24 | 0.69  | 0.62 | 0.42  | 1.02          | 5.13 | 4.97 | 0.91  | 1.20 | 1.38 | AP2 domain-containing transcription factor family protein                   |
| <b>Class II (4 of 99)</b>                                                             |           |     |                   |      |      |       |      |       |               |      |      |       |      |      |                                                                             |
| [17.2.2] hormone metabolism.auxin signal transduction                                 | At1g23080 |     | 0.82              | 0.50 | 0.40 | 0.71  | 0.93 | 0.71  | 1.04          | 0.84 | 0.65 | 0.67  | 1.19 | 1.12 | PIN7 (PIN-FORMED 7)                                                         |
| [17.3.1.1.1] hormone metabolism.brassinosteroid synthesis-degradation.BR.DET2         | At5g16010 |     | 0.82              | 0.22 | 0.05 | 0.93  | 0.67 | 0.39  | 2.07          | 1.41 | 0.36 | 2.10  | 1.69 | 0.69 | 3-oxo-5-alpha-steroid 4-dehydrogenase family protein                        |
| [17.7.1.5] hormone metabolism.jasmonate.synthesis-degradation.12-Oxo-PDA-reductase    | At2g06050 |     | 1.77              | 0.54 | 0.52 | 1.25  | 0.32 | 0.24  | 0.54          | 0.12 | 0.11 | 1.04  | 0.13 | 0.05 | OPR3 (OPDA-REDUCTASE 3)                                                     |
| [17.7.1.2] hormone metabolism.jasmonate.synthesis-                                    | At1g17420 |     | 2.75              | 0.29 | 0.11 | 1.52  | 0.18 | 0.18  | 0.77          | 0.08 | 0.04 | 0.94  | 0.12 | 0.03 | LOX3 (Lipoxygenase 3); iron ion binding / lipoxygenase                      |
| <b>Class III (22 of 387)</b>                                                          |           |     |                   |      |      |       |      |       |               |      |      |       |      |      |                                                                             |
| [17.1.3] hormone metabolism.abscisic acid.induced-regulated-responsive-activated      | At2g47770 |     | 0.67              | 0.12 | 0.08 | 1.88  | 5.92 | 17.84 | 2.39          | 1.60 | 0.69 | 1.60  | 8.24 | 9.86 | benzodiazepine receptor-related                                             |
| [17.1.3] hormone metabolism.abscisic acid.induced-regulated-responsive-activated      | At3g02480 |     | 1.59              | 0.81 | 0.38 | 3.98  | 2.87 | 8.65  | 1.74          | 1.62 | 1.43 | 1.51  | 1.31 | 2.24 | ABA-responsive protein-related                                              |
| [17.1.3] hormone metabolism.abscisic acid.induced-regulated-responsive-activated      | At5g59220 |     | 0.58              | 0.18 | 0.11 | 1.97  | 4.13 | 9.83  | 2.41          | 0.69 | 0.58 | 1.77  | 0.78 | 0.62 | protein phosphatase 2C, putative / PP2C, putative                           |
| [17.1.1.10] hormone metabolism.abscisic acid signal transduction                      | At1g78390 |     | 0.55              | 0.32 | 0.34 | 1.01  | 1.88 | 1.10  | 1.09          | 0.74 | 0.57 | 1.09  | 2.61 | 1.81 | NCED9 (NINE-CIS-EPOXYCAROTENOID DIOXYGENASE 9)                              |
| [17.1.2] hormone metabolism.abscisic acid signal transduction                         | At4g26080 |     | 0.41              | 0.40 | 0.42 | 0.68  | 1.32 | 1.62  | 1.48          | 0.84 | 0.86 | 1.37  | 1.27 | 1.32 | AB11 (ABA INSENSITIVE 1); calcium ion binding / protein phosphatase type 2C |
| [17.1.2] hormone metabolism.abscisic acid signal transduction                         | At4g34000 |     | 0.52              | 0.34 | 0.33 | 0.95  | 2.04 | 3.06  | 0.89          | 0.73 | 0.71 | 0.76  | 1.19 | 1.40 | ABF3/DPBF5 (ABSCISIC ACID RESPONSIVE ELEMENTS-BINDING FACTOR 3)             |
| [17.1.2] hormone metabolism.abscisic acid signal transduction                         | At5g57050 |     | 0.50              | 0.17 | 0.22 | 0.91  | 1.90 | 3.61  | 1.36          | 0.59 | 0.59 | 1.52  | 1.45 | 1.33 | AB12 (ABA INSENSITIVE 2); protein phosphatase type 2C                       |
| [17.2.1.1001] hormone metabolism.auxin synthesis-degradation                          | At1g24100 |     | 0.97              | 0.57 | 0.59 | 0.91  | 0.57 | 0.55  | 0.50          | 0.26 | 0.35 | 0.69  | 0.67 | 0.44 | UGT74B1 (UDP-glucosyl transferase 74B1)                                     |
| [17.2.3] hormone metabolism.auxin.induced-regulated-responsive-activated              | At1g28130 |     | 0.39              | 0.17 | 0.21 | 1.03  | 0.79 | 0.61  | 0.63          | 0.58 | 0.69 | 1.19  | 1.19 | 1.29 | GH3.17; indole-3-acetic acid amido synthetase                               |
| [17.2.3] hormone metabolism.auxin.induced-regulated-responsive-activated              | At3g61750 |     | 0.74              | 0.27 | 0.23 | 0.80  | 0.56 | 0.53  | 1.01          | 0.49 | 0.70 | 0.65  | 0.83 | 0.52 | auxin-responsive protein-related                                            |
| [17.2.3] hormone metabolism.auxin.induced-regulated-responsive-activated              | At5g10990 |     | 0.30              | 0.28 | 0.33 | 0.81  | 1.58 | 1.70  | 0.75          | 0.42 | 0.49 | 0.95  | 1.04 | 0.77 | auxin-responsive family protein                                             |
| [17.2.3] hormone metabolism.auxin.induced-regulated-responsive-activated              | At5g47530 |     | 0.52              | 0.11 | 0.10 | 1.10  | 0.36 | 1.17  | 1.05          | 0.33 | 0.51 | 0.07  | 1.37 | 0.83 | auxin-responsive protein, putative                                          |
| [17.2.3] hormone metabolism.auxin.induced-regulated-responsive-activated              | At5g53590 |     | 0.77              | 0.59 | 0.46 | 1.56  | 1.03 | 0.86  | 1.48          | 1.25 | 1.11 | 1.17  | 0.77 | 0.58 | auxin-responsive family protein                                             |
| [17.2.3] hormone metabolism.auxin.induced-regulated-responsive-activated              | At5g54510 |     | 0.75              | 0.56 | 0.46 | 0.89  | 1.69 | 1.49  | 1.24          | 1.10 | 0.77 | 1.15  | 2.64 | 3.48 | DFL1 (DWARF IN LIGHT 1); indole-3-acetic acid amido synthetase              |
| [17.2.2] hormone metabolism.auxin signal transduction                                 | At1g23080 |     | 0.75              | 0.46 | 0.41 | 0.66  | 0.96 | 0.73  | 1.09          | 0.87 | 0.78 | 0.62  | 1.17 | 1.04 | PIN7 (PIN-FORMED 7); auxin:hydrogen symporter/ transporter                  |
| [17.3.1.2.99] hormone metabolism.brassinosteroid synthesis-degradation.steroids.other | At5g24140 |     | 1.04              | 0.45 | 0.32 | 1.70  | 1.47 | 1.19  | 2.33          | 2.38 | 1.22 | 2.68  | 3.82 | 2.49 | SQP2 (Squalene monooxygenase 2); oxidoreductase                             |
| [17.4.1.1003] hormone metabolism.cytokinin.synthesis-degradation                      | At2g41510 |     | 0.62              | 0.47 | 0.19 | 0.95  | 0.83 | 0.57  | 1.21          | 1.90 | 0.64 | 0.81  | 1.56 | 0.79 | ATCKX1/CKX1 (CYTOKININ OXIDASE/DEHYDROGENASE 1)                             |
| [17.4.1.1003] hormone metabolism.cytokinin.synthesis-degradation                      | At5g05870 |     | 0.73              | 0.47 | 0.47 | 0.86  | 0.97 | 0.97  | 1.12          | 1.07 | 1.23 | 1.20  | 1.04 | 1.08 | UGT76C1 (UDP-GLUCOSYL TRANSFERASE 76C1)                                     |
| [17.5.1.1002] hormone metabolism.ethylene.synthesis-degradation                       | At5g12270 |     | 1.23              | 0.61 | 0.39 | 1.10  | 0.93 | 1.29  | 1.51          | 3.23 | 1.11 |       | 0.49 | 1.26 | oxidoreductase, 2OG-Fe(II) oxygenase family protein                         |
| [17.5.1.1002] hormone metabolism.ethylene.synthesis-degradation                       | At5g59530 |     | 0.83              | 0.66 | 0.49 | 0.99  | 0.94 | 0.66  | 1.52          | 1.77 | 1.42 | 1.25  | 0.82 | 0.51 | 2-oxoglutarate-dependent dioxygenase, putative                              |
| [17.6.1.12] hormone metabolism.gibberellin.synthesis-degradation.GA3                  | At1g80340 |     | 0.44              | 0.28 | 0.29 | 0.93  | 0.44 | 1.41  | 0.66          | 0.68 | 0.46 | 0.95  | 0.34 | 1.12 | GA4H (gibberellin 3 beta-hydroxylase); gibberellin 3-beta-dioxygenase       |
| [17.7.3] hormone metabolism.jasmonate.induced-regulated-responsive-activated          | At5g48180 |     | 1.11              | 0.80 | 0.42 | 1.03  | 2.11 | 2.73  | 2.19          | 2.24 | 1.30 | 1.35  | 2.29 | 2.45 | kelch repeat-containing protein                                             |
| <b>Cell wall</b>                                                                      |           |     |                   |      |      |       |      |       |               |      |      |       |      |      |                                                                             |
| <b>Class I (1 of 195)</b>                                                             |           |     |                   |      |      |       |      |       |               |      |      |       |      |      |                                                                             |
| [10.6.3] cell wall.degradation.pectate lyases and polygalacturonases                  | At5g63180 |     | 0.50              | 0.94 | 0.97 | 0.70  | 0.64 | 0.45  | 1.32          | 0.75 | 0.37 | 0.91  | 1.24 | 1.12 | pectate lyase family protein                                                |
| <b>Class II (8 of 99)</b>                                                             |           |     |                   |      |      |       |      |       |               |      |      |       |      |      |                                                                             |
| [10.2.1] cell wall.cellulose synthesis.cellulose synthase                             | At1g02730 |     | 0.84              | 0.38 | 0.70 | 1.25  | 0.62 | 0.45  | 0.59          | 0.22 | 0.27 | 0.50  | 0.23 | 0.16 | ATCSLD5 (Cellulose synthase-like D5)                                        |
| [10.2.1] cell wall.cellulose synthesis.cellulose synthase                             | At4g39350 |     | 1.10              | 0.37 | 0.57 | 0.90  | 0.55 | 0.46  | 0.67          | 0.19 | 0.21 | 0.72  | 0.49 | 0.33 | CESA2 (CELLULOSE SYNTHASE 2)                                                |
| [10.2] cell wall.cellulose synthesis                                                  | At5g03760 |     | 0.77              | 0.24 | 0.35 | 0.85  | 0.57 | 0.56  | 0.68          | 0.14 | 0.16 | 0.54  | 0.30 | 0.16 | ATCSLA09 (RESISTANT TO AGROBACTERIUM TRANSFORMATION 4)                      |
| [10.5.1] cell wall.cell wall proteins.AGPs                                            | At3g13520 |     | 0.96              | 0.44 | 0.21 | 1.03  | 0.55 | 0.57  | 1.94          | 0.84 | 0.59 | 1.33  | 1.22 | 0.79 | AGP12 (ARABINOGALACTAN PROTEIN 12)                                          |
| [10.5.1] cell wall.cell wall proteins.AGPs                                            | At5g44130 |     | 1.78              | 2.67 | 0.69 | 0.92  | 0.64 | 0.38  | 1.58          | 6.19 | 4.37 | 1.10  | 2.07 | 1.36 | fasclcin-like arabinogalactan-protein, putative                             |
| [10.6.3] cell wall.degradation.pectate lyases and polygalacturonases                  | At1g70370 |     | 1.49              | 0.23 | 0.31 | 1.55  | 0.81 | 0.41  | 0.79          | 0.15 | 0.11 | 0.71  | 0.21 | 0.17 | BURP domain-containing protein / polygalacturonase, putative                |
| [10.6.2] cell wall.degradation.mannan-xylose-arabinose-fucose                         | At1g02640 |     | 1.21              | 0.77 | 0.55 | 1.07  | 1.04 | 0.66  | 0.92          | 1.91 | 1.03 | 1.03  | 1.55 | 1.50 | BXL2 (BETA-XYLOSIDASE 2); hydrolase                                         |
| [10.8.1] cell wall.pectin*esterases.PME                                               | At1g41830 |     | 1.09              | 0.44 | 0.51 | 1.01  | 0.45 | 0.45  | 0.87          | 0.33 | 0.22 | 0.69  | 0.28 | 0.18 | SKS6 (SKU5 Similar 6); pectinesterase                                       |
| <b>Class III (13 of 387)</b>                                                          |           |     |                   |      |      |       |      |       |               |      |      |       |      |      |                                                                             |
| [10.1.9] cell wall.precursor synthesis.MUR4                                           | At4g20460 |     | 0.76              | 0.94 | 0.62 | 1.00  | 1.08 | 0.85  | 1.66          | 3.78 | 2.47 | 4.94  | 8.31 | 5.51 | NAD-dependent epimerase/dehydratase family protein                          |
| [10.1.2] cell wall.precursor synthesis.UGE                                            | At4g23920 |     | 0.84              | 0.36 | 0.28 | 1.42  | 1.06 | 1.27  | 1.54          | 0.74 | 0.58 | 0.77  | 0.77 | 0.50 | UGE2 (UDP-D-glucose/UDP-D-galactose 4-epimerase 2)                          |
| [10.3.2] cell wall.hemicellulose synthesis.glucuronoxylan                             | At1g19300 |     | 1.04              | 0.63 | 0.36 | 1.50  | 0.74 | 0.90  | 0.66          | 0.25 | 0.18 | 0.86  | 0.31 | 0.16 | GATL1/GLZ1/PARVUS (Galacturonosyltransferase-like 1)                        |
| [10.5.1] cell wall.cell wall proteins.AGPs                                            | At2g20520 |     | 0.63              | 0.28 | 0.18 | 1.12  | 1.03 | 1.13  | 2.23          | 0.78 | 0.75 | 1.03  | 0.66 | 0.65 | FLA6 (FLA6)                                                                 |
| [10.6.3] cell wall.degradation.pectate lyases and polygalacturonases                  | At4g22090 |     | 0.67              | 0.32 | 0.26 | 1.55  | 0.32 | 0.93  | 1.70          | 1.29 | 0.52 |       | 2.33 | 1.10 | pectate lyase family protein                                                |
| [10.6.3] cell wall.degradation.pectate lyases and polygalacturonases                  | At4g23500 |     | 0.86              | 0.68 | 0.51 | 1.05  | 1.03 | 1.01  | 1.11          | 1.04 | 1.05 | 1.05  | 1.01 | 1.12 | glycoside hydrolase family 28 protein / polygalacturonase (pectinase)       |
| [10.6.3] cell wall.degradation.pectate lyases and polygalacturonases                  | At5g06860 |     | 1.13              | 0.67 | 0.32 | 1.29  | 1.51 | 1.24  | 1.24          | 1.98 | 1.09 | 1.11  | 1.78 | 1.97 | PGIP1 (POLYGALACTURONASE INHIBITING PROTEIN 1)                              |
